# Supplementary material for: Partner HIV serostatus disclosure and determinants of serodiscordance among prevention of mother to child transmission clients in Nigeria
Source: Springer Nature journal article supplement (doi:10.1186/s12889-015-2155-x), 2015-08-26
Supplement: MOESM2 [file 9750146]

Additional file 2 HIVQUAL Sample Size Determination Chart based on a 95% CI.

| <b>Population Size</b> | <b>Sample Size for a 95% CI to have width of 0.16</b> |
|------------------------|-------------------------------------------------------|
| <b>Up to 20</b>        | <b>All</b>                                            |
| <b>30</b>              | <b>26</b>                                             |
| <b>40</b>              | <b>32</b>                                             |
| <b>50</b>              | <b>38</b>                                             |
| <b>60</b>              | <b>43</b>                                             |
| <b>70</b>              | <b>48</b>                                             |
| <b>80</b>              | <b>53</b>                                             |
| <b>90</b>              | <b>57</b>                                             |
| <b>100</b>             | <b>61</b>                                             |
| <b>101 – 119</b>       | <b>67</b>                                             |
| <b>120 -139</b>        | <b>73</b>                                             |
| <b>140 – 159</b>       | <b>78</b>                                             |
| <b>160 – 179</b>       | <b>82</b>                                             |
| <b>180 – 199</b>       | <b>86</b>                                             |
| <b>200 -249</b>        | <b>94</b>                                             |
| <b>250 -299</b>        | <b>101</b>                                            |
| <b>300 – 349</b>       | <b>106</b>                                            |
| <b>350 – 399</b>       | <b>110</b>                                            |
| <b>400 – 449</b>       | <b>113</b>                                            |
| <b>450 – 499</b>       | <b>116</b>                                            |
| <b>500 – 749</b>       | <b>127</b>                                            |
| <b>750 – 999</b>       | <b>131</b>                                            |
| <b>1000 – 4999</b>     | <b>146</b>                                            |
| <b>5000 or More</b>    | <b>150</b>                                            |
